# Supplementary material for: Evaluation of anifrolumab safety in systemic lupus erythematosus: A meta-analysis and systematic review
Source: PubMed Central journal article supplement (PMC9537685; doi:10.3389/fimmu.2022.996662), 2022-09-23

## 1.1 serious adverse events

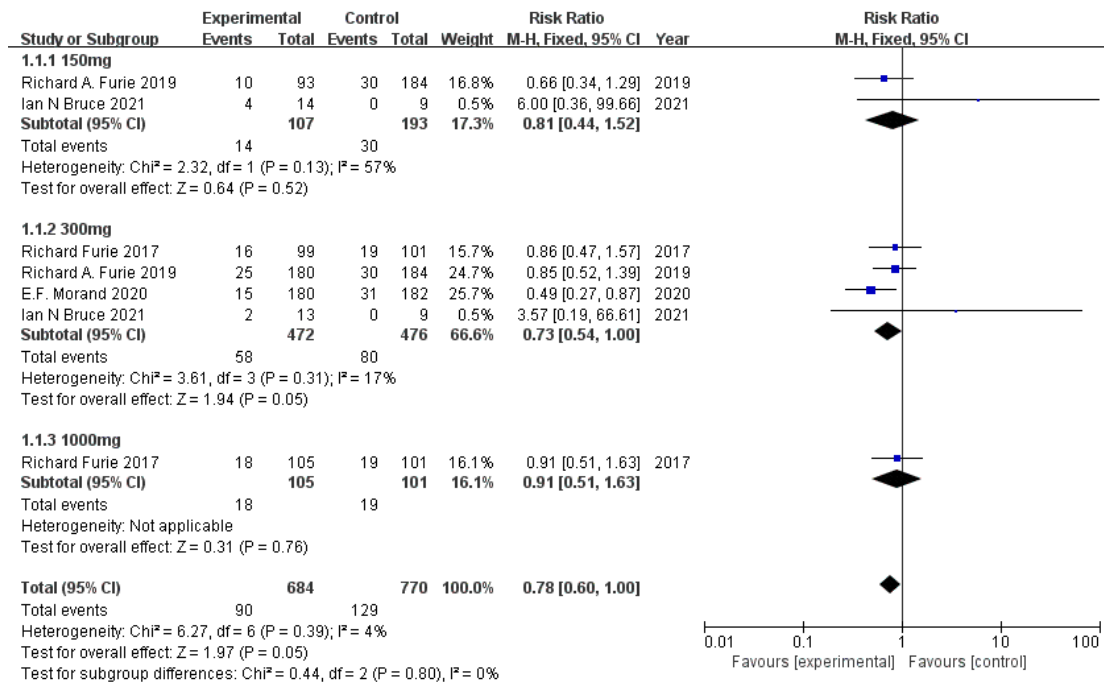

## 1.2 death

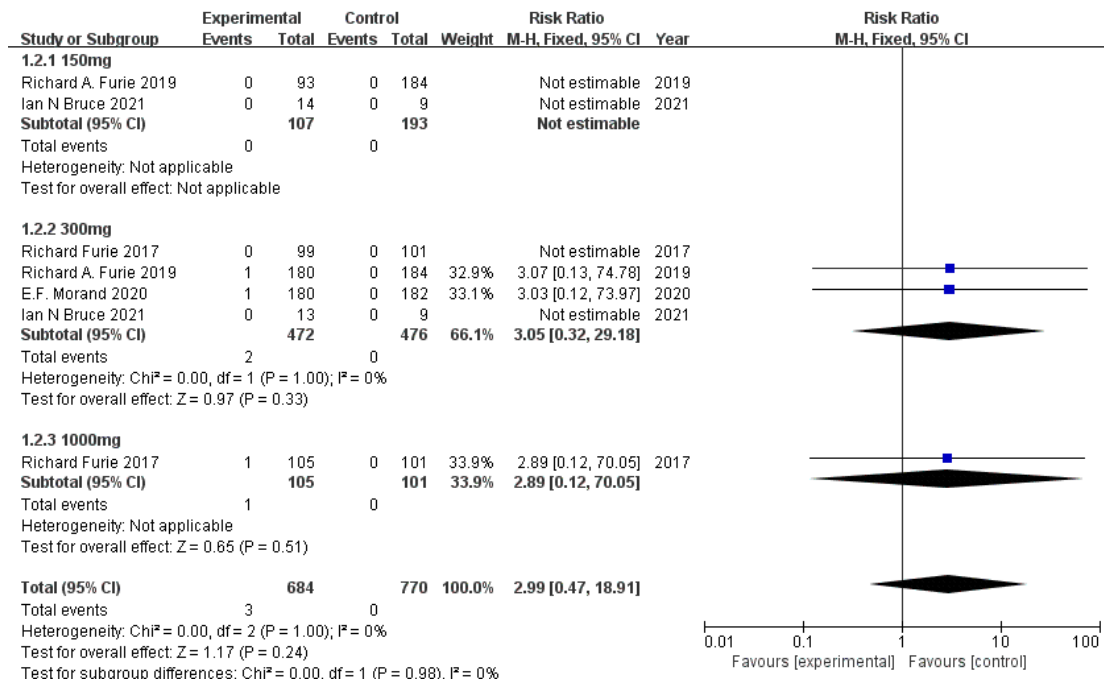

### 1.3 Adverse events leading to discontinuation

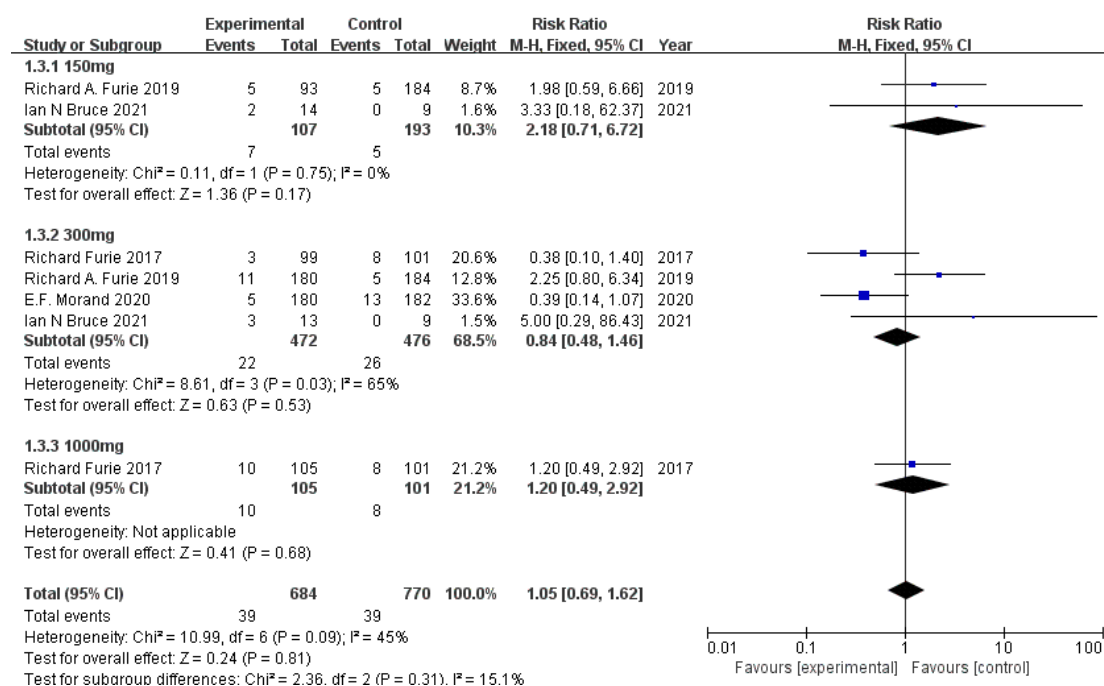

### 1.4 headache

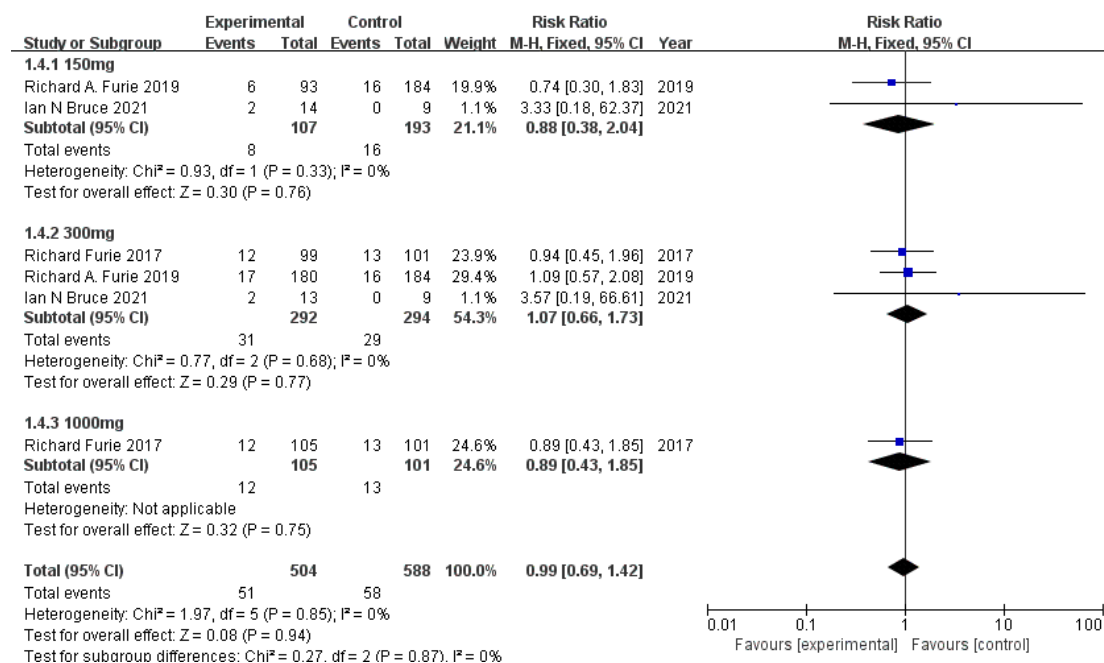

## 1.5 Upper respiratory tract infection

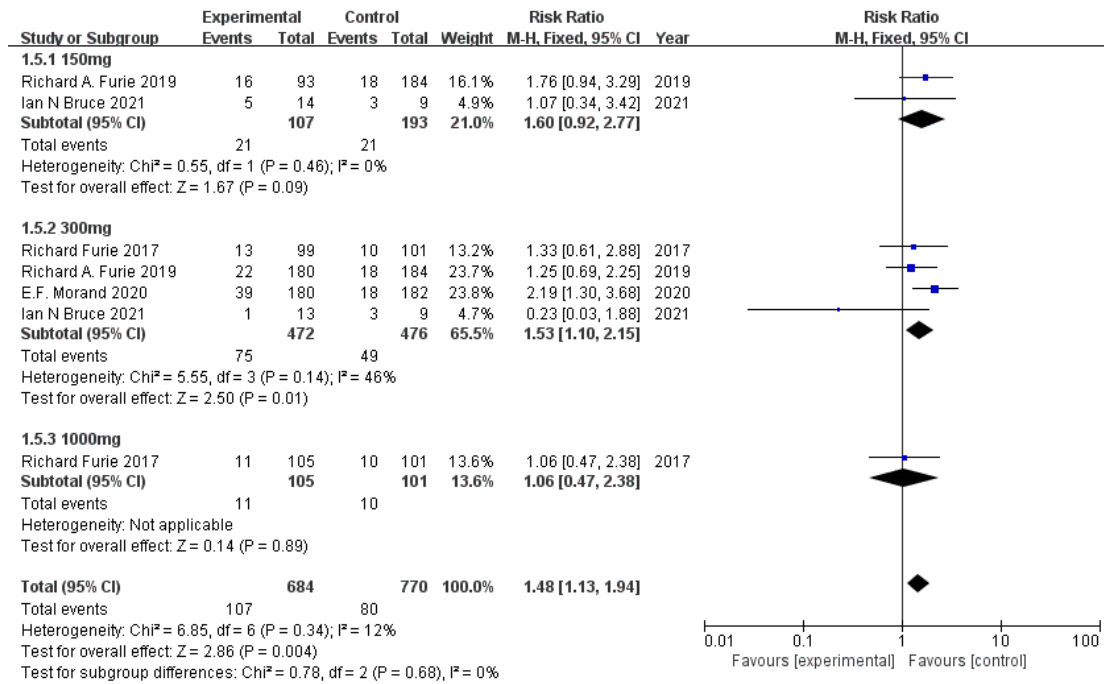

## 1.6 Nasopharyngitis

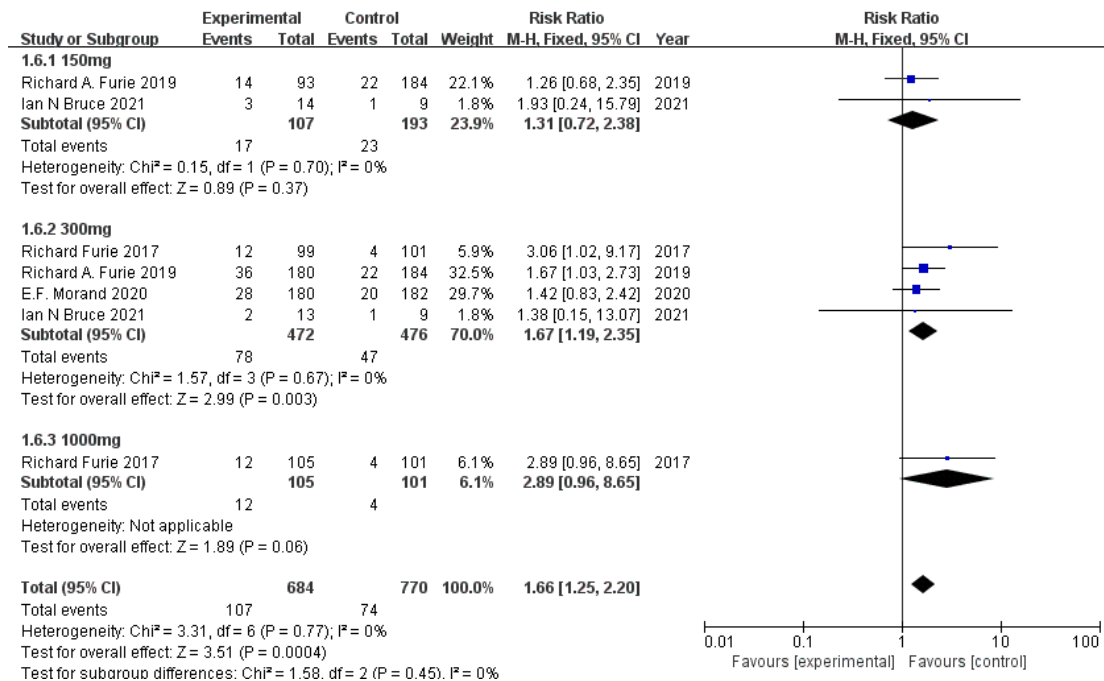

## 1.7 Urinary tract infection

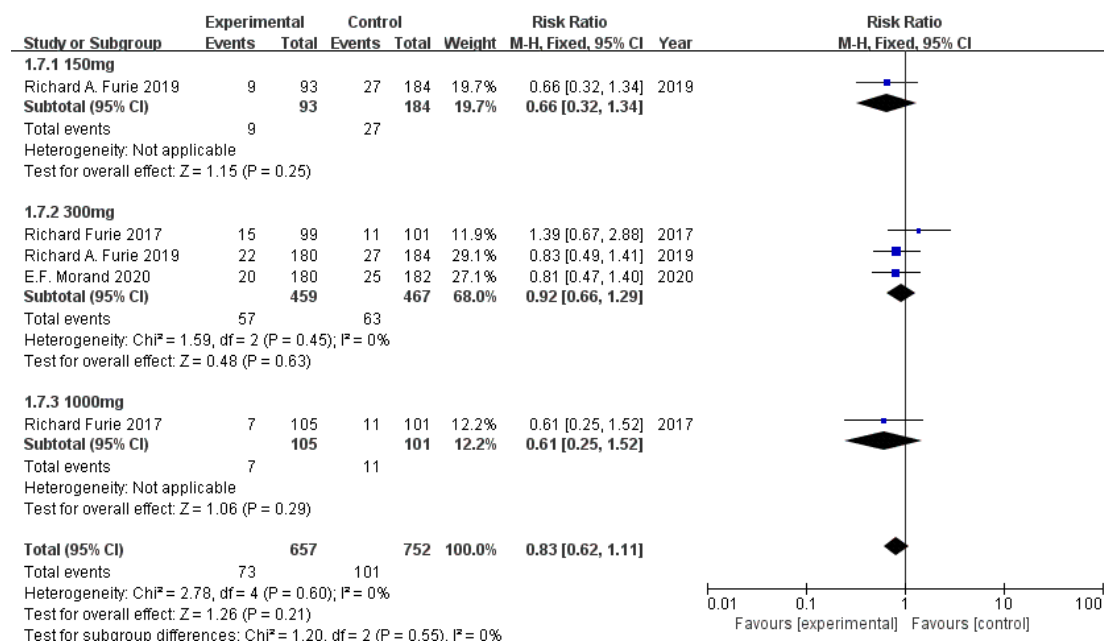

## 1.8 Bronchitis

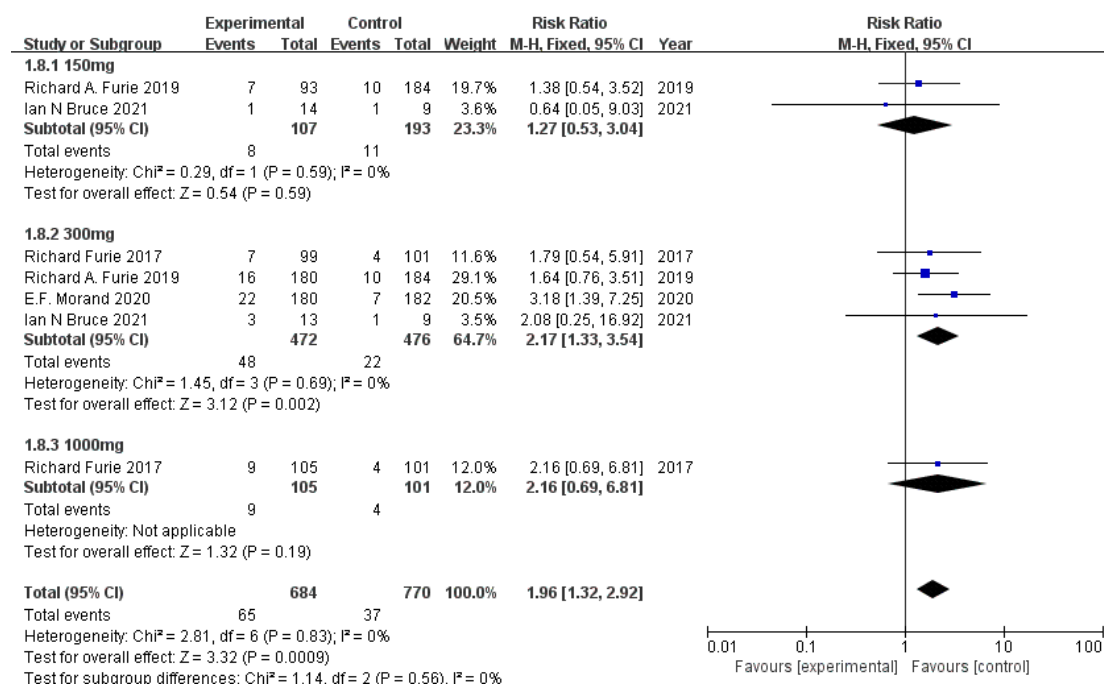

## 1.9 Herpes zoster

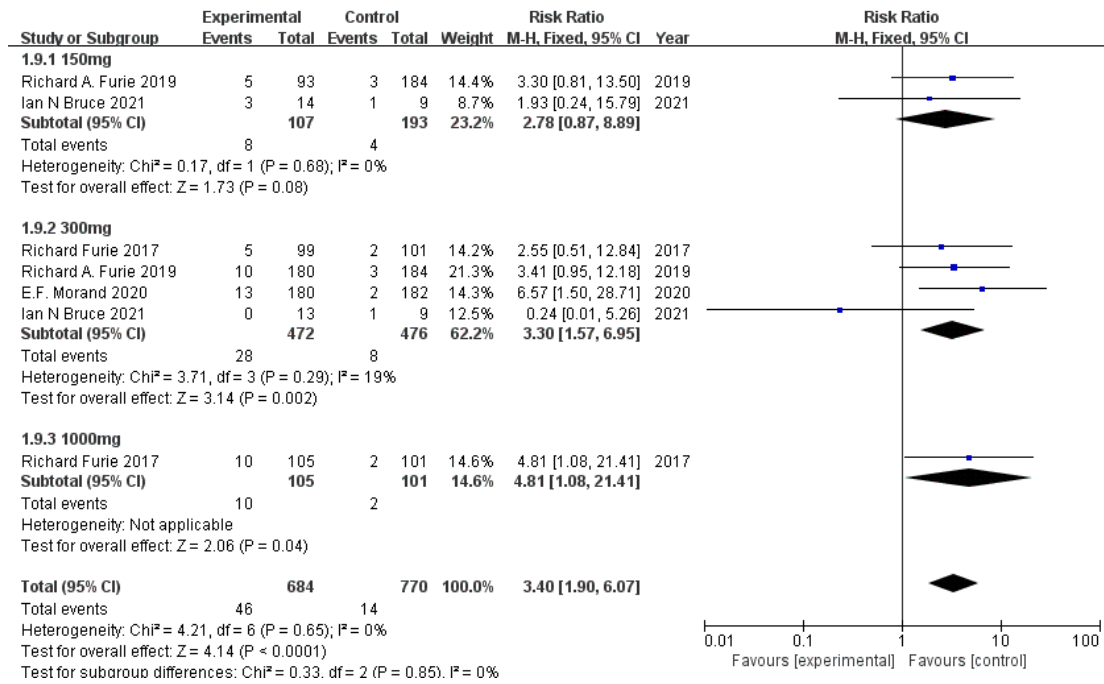

## 1.10 Influenza

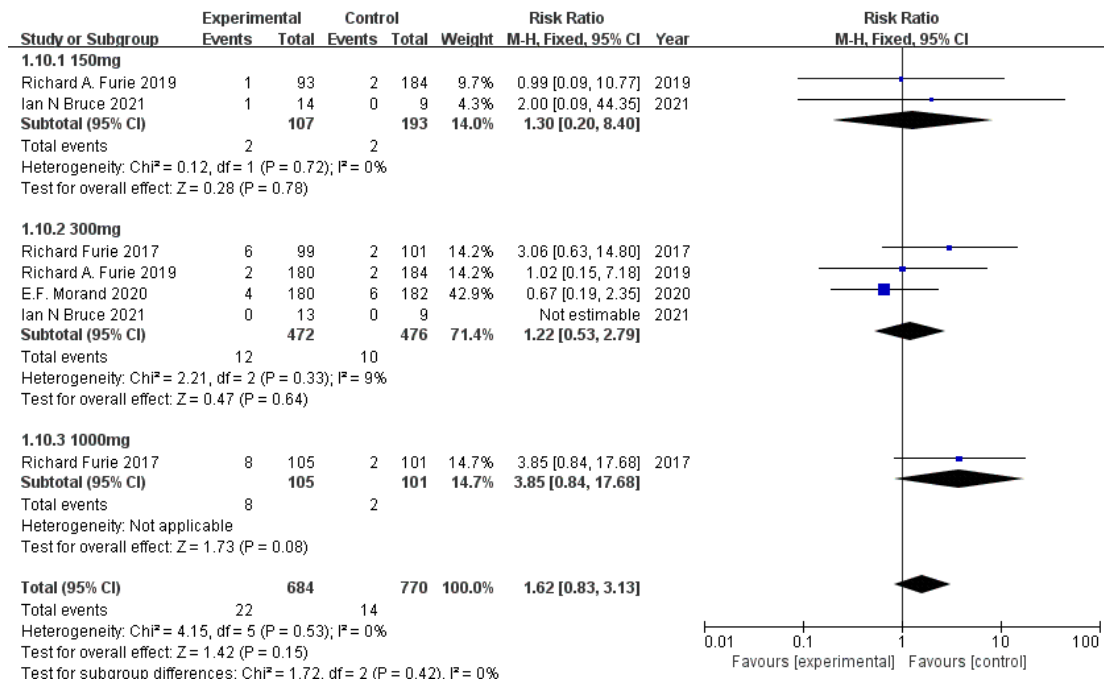

## 1.11 Sinusitis

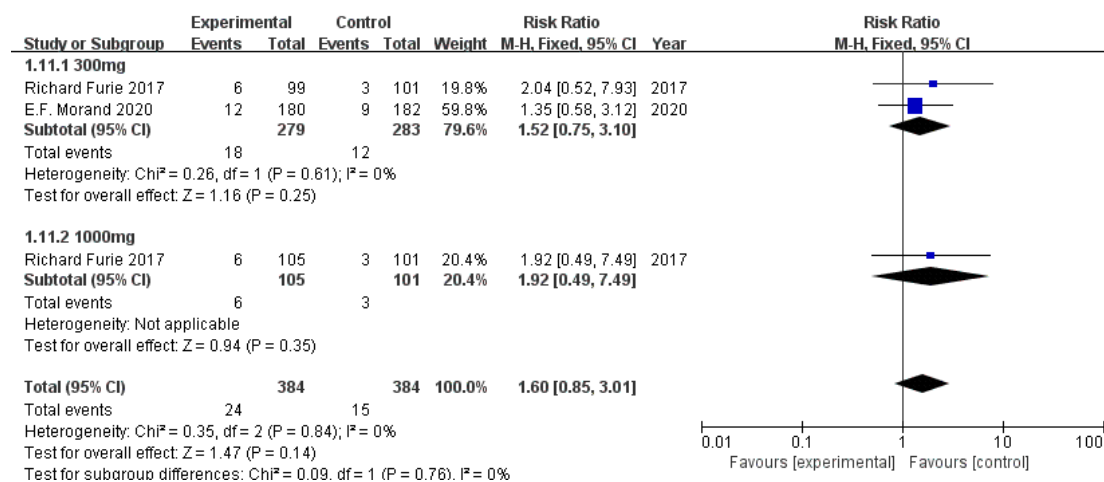

## 1.12 Cough

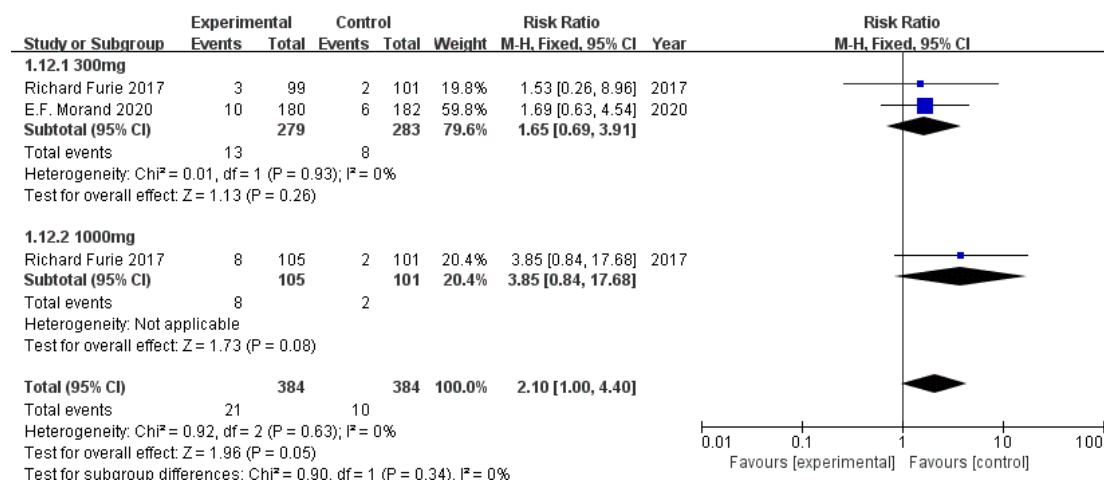

### 1.13 Tuberculosis

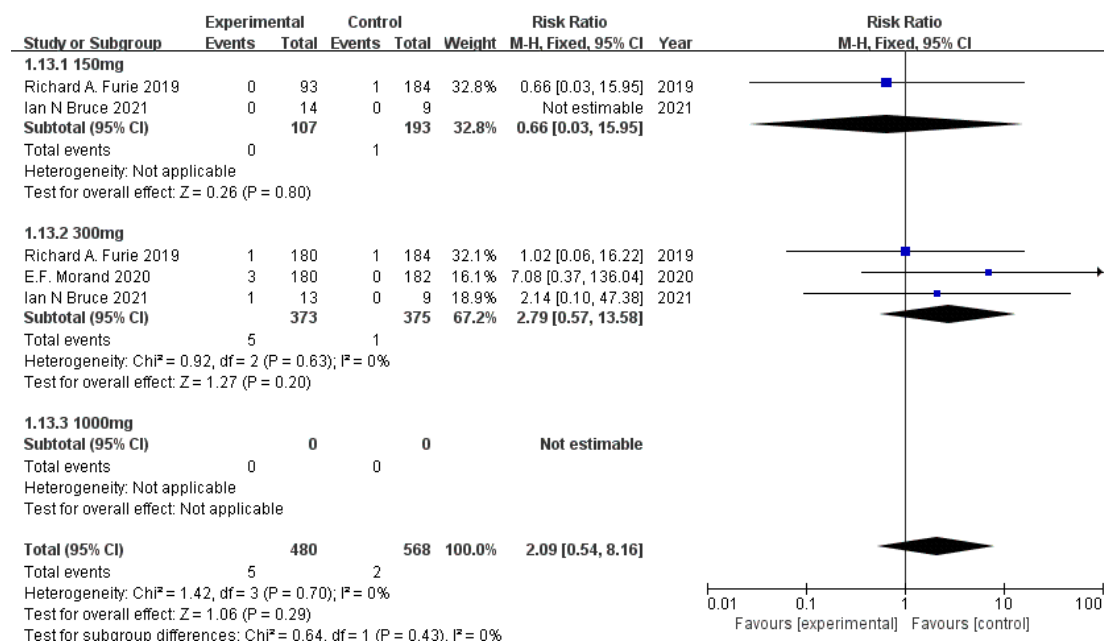

### 1.14 Malignancy

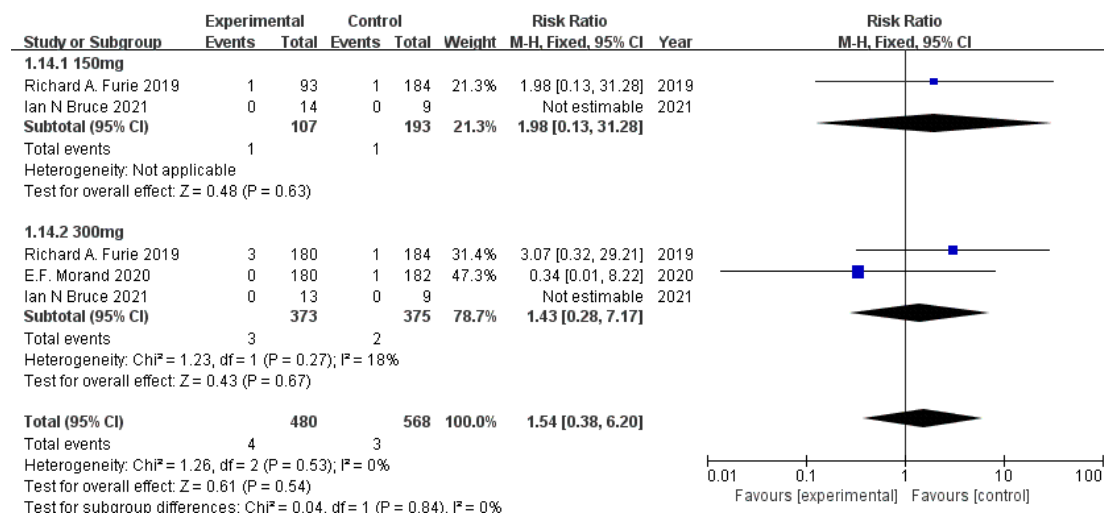

### 1.15 Infusion-related reaction

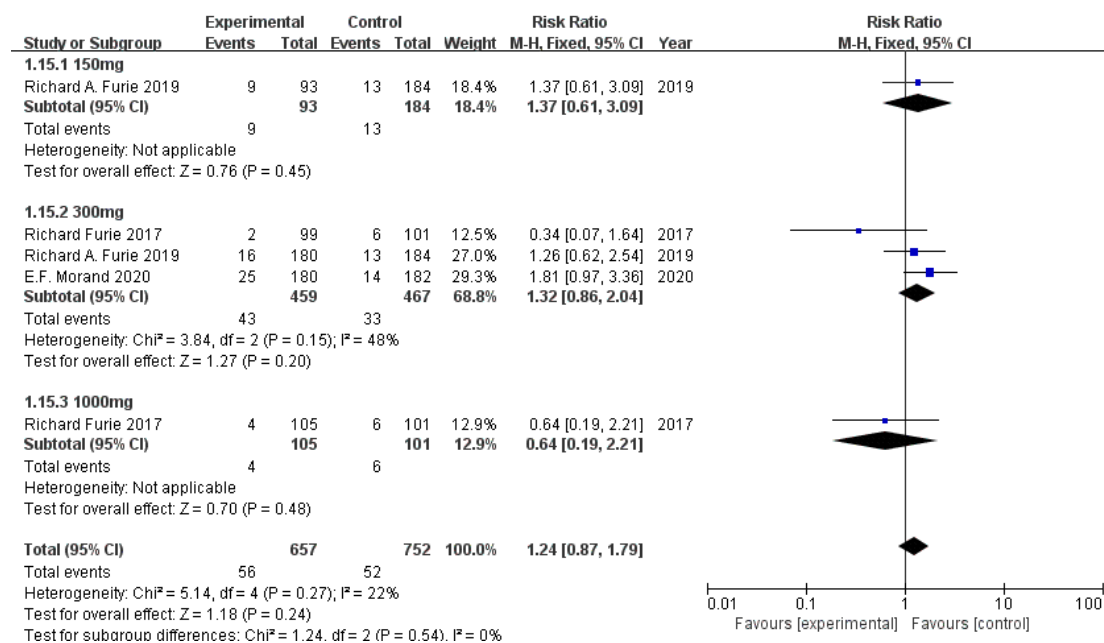

### 1.16 Anaphylaxis

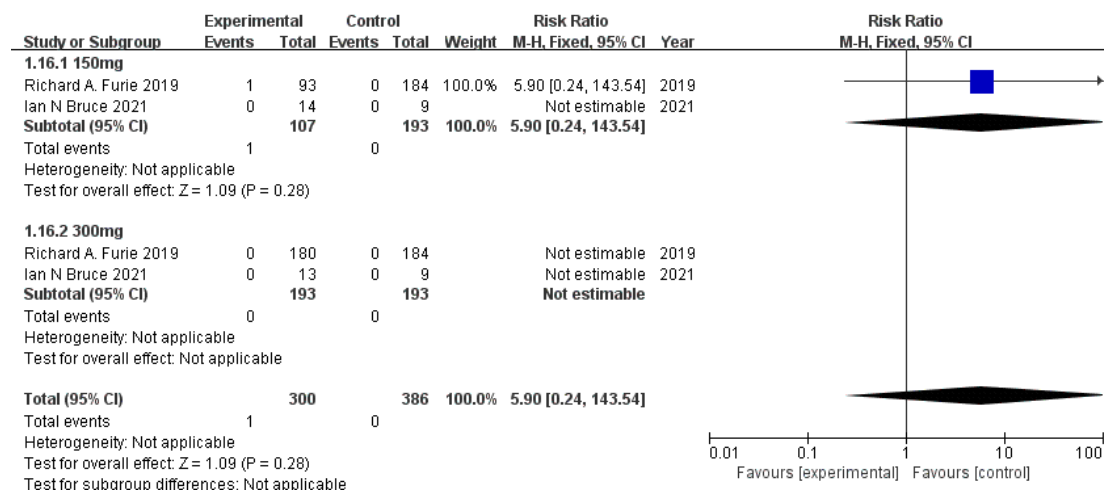



## 1.17 Non-opportunistic infections

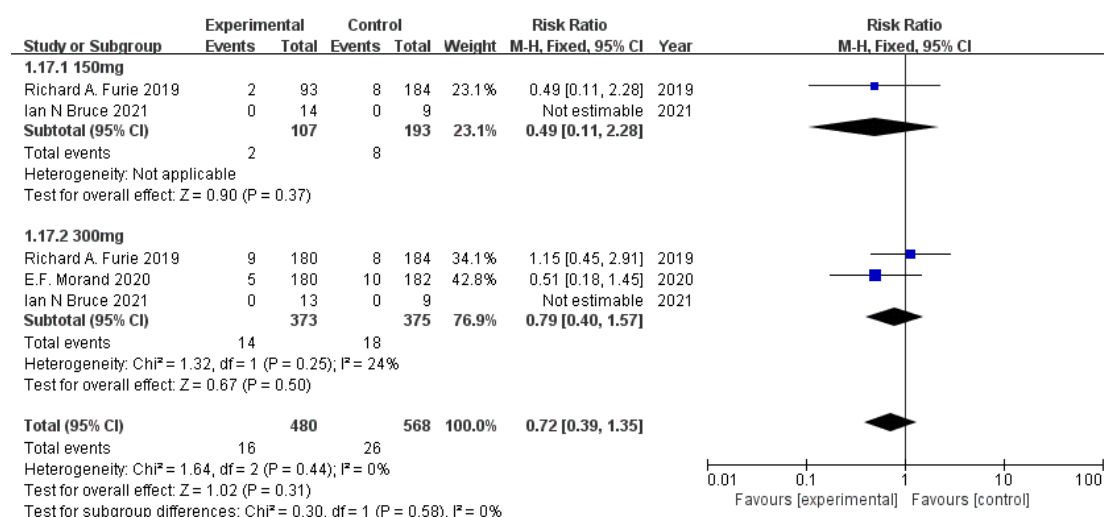

## 1.18 Opportunistic infections

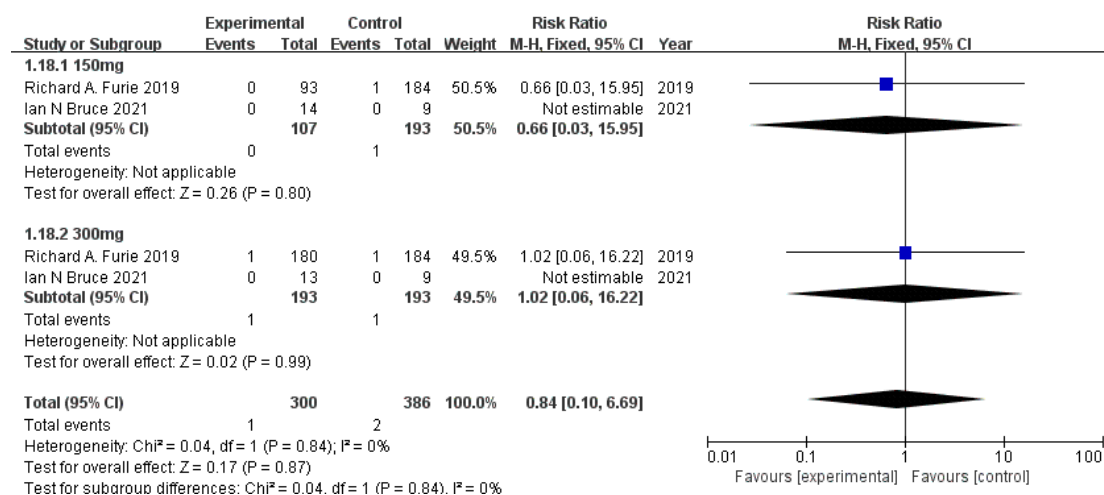

Supplement: Image_1.pdf [file Image_1.pdf]
